# Supplementary material for: Reliable reconstruction of HIV-1 whole genome haplotypes reveals clonal interference and genetic hitchhiking among immune escape variants
Source: PubMed Central journal article supplement (PMC4227095; doi:10.1186/1742-4690-11-56), 2014-07-04
Supplement: 1742-4690-11-56-S1.pdf [file 1742-4690-11-56-S1.pdf]

## Additional File 1

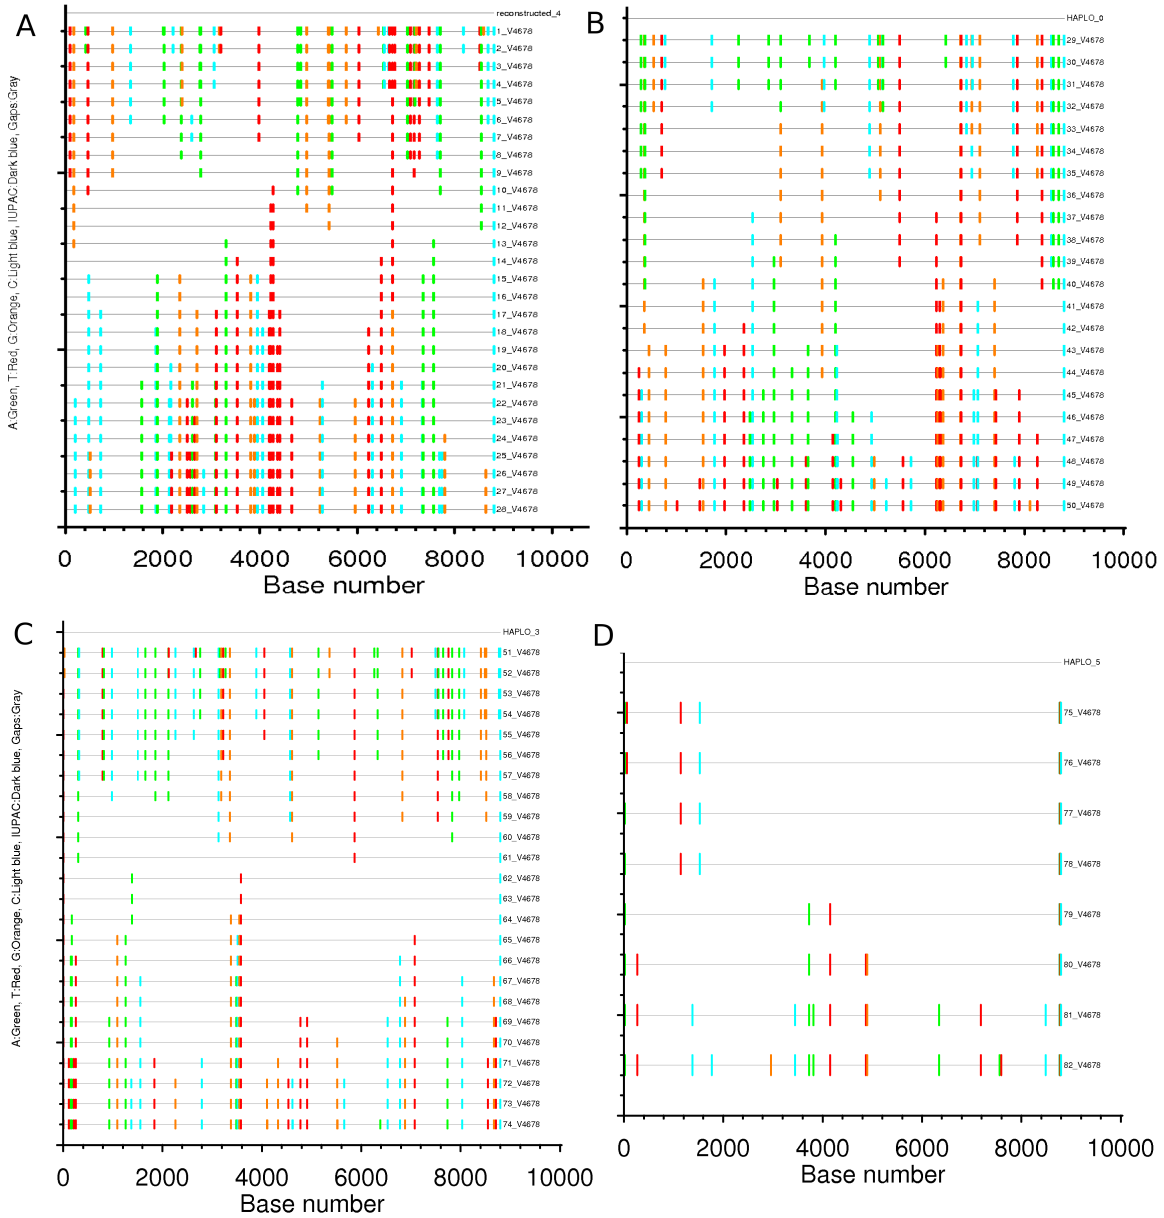

Figure S1: Sequence alignments of the reconstructed haplotype and the corresponding quasispecies. Sequence alignment of four most prevalent haplotypes (A) haplotype\_4, (B) haplotype\_0, (C) haplotype\_3, and (D) haplotype\_5 and the corresponding quasispecies. Mismatches between the simulated genomes and the reconstructed haplotype are indicated as vertical lines with different colors corresponding to different nucleotides (A: Green, T: Red, G: Orange, C: Light blue and Gaps: Gray). The variation at each genomic site was present only in a subset of genomes demonstrating that the haplotypes are reconstructed as consensus sequences of the corresponding quasispecies.
